# Supplementary material
Source: PubMed Central journal article supplement (PMC2648370)
Supplement: supp_191_6_1765__1.pdf [file supp_191_6_1765__1.pdf]

Table S1: Primers used in this work\*

| Name                                          | Nucleotide sequence (5'-3')       | Comment                                                                                     |
|-----------------------------------------------|-----------------------------------|---------------------------------------------------------------------------------------------|
| <b>Primers used for RT-PCR</b>                |                                   |                                                                                             |
| RT-1F                                         | CATCGGCATTGGCGTGGAAG              | MXAN0736-MXAN0735 intergenic region                                                         |
| RT-1R                                         | GCGTCCGGGGCATCCTGTC               | MXAN0736-MXAN0735 intergenic region                                                         |
| RT-2F                                         | CCCTGCTCGCGTCGCTCG                | MXAN0735 internal region                                                                    |
| RT-2R                                         | CGAAGTCGCTCTGGGCGATG              | MXAN0735 internal region                                                                    |
| RT-3F                                         | CGTGCGCACCCACTTCATCC              | MXAN0735-MXAN0734 intergenic region                                                         |
| RT-3R                                         | CCTCGTGGATGCCGGTGTG               | MXAN0735-MXAN0734 intergenic region                                                         |
| RT-4F                                         | GCGCTCCGCTCCCACTGGT               | MXAN0734 internal region                                                                    |
| RT-4R                                         | GGCGTACCACATGCGTCC                | MXAN0734 internal region                                                                    |
| RT-5F                                         | CGGCATGACGCGCAGCTTCTTC            | MXAN0734- <i>rodK</i> intergenic region                                                     |
| RT-5R                                         | CCAAGCCCCACGTGCGTGAC              | MXAN0734- <i>rodK</i> intergenic region                                                     |
| RT-6F                                         | GTGGGTGAGGTGCTGGTG                | <i>rodK</i> internal region                                                                 |
| RT-6R                                         | GATGACGTCCTCCAGCGC                | <i>rodK</i> internal region                                                                 |
| RT-7F                                         | CTGTGCTTCCCCGCCTGG                | <i>rodK-rokA</i> intergenic region                                                          |
| RT-7R                                         | TCTTCGGCAGCGGTACTION              | <i>rodK-rokA</i> intergenic region                                                          |
| RT-8F                                         | GGACGACGACCCGGACCTGC              | <i>rokA</i> internal region                                                                 |
| RT-8R                                         | CGCGCAGGCGCTGTGCCAGC              | <i>rokA</i> internal region                                                                 |
| RT-9F                                         | GGACGACGACCCGGACCTGC              | <i>rokA</i> -MXAN0731 intergenic region                                                     |
| RT-9R                                         | GAGGGTTCTGCCAGTTCCG               | <i>rokA</i> -MXAN0731 intergenic region                                                     |
| <b>Primers used for plasmid constructions</b> |                                   |                                                                                             |
| <b>pSW01</b>                                  |                                   |                                                                                             |
| pSW01_1                                       | atcggaaagcttGTGGTGCTCACCGGCAAGACG | Construction of pSW01 (Amplification from genomic DNA DK1622) cloned HindIII-XbaI in pBJ114 |
| pSW01_2                                       | caggtggaaCACCAGGACGCGCTTTTTTC     | Construction of pSW01 (Amplification from genomic DNA DK1622) cloned HindIII-XbaI in pBJ114 |
| pSW01_3                                       | gtcctggtgTTCCACCTGAAGCCCCGGCCG    | Construction of pSW01 (Amplification from genomic DNA DK1622) cloned HindIII-XbaI in pBJ114 |
| pSW01_4                                       | tagcctctagaGCCGCTGCCGTTGCCAGGC    | Construction of pSW01 (Amplification from genomic DNA DK1622) cloned HindIII-XbaI in pBJ114 |
| <b>pMA16</b>                                  |                                   |                                                                                             |
| pMA16_1                                       | atcggaaagcttCCTCCACCACCTCCGCGCAG  | Construction of pMA16 (Amplification from genomic DNA DK1622) cloned HindIII-XbaI in pBJ114 |

|               |                                   |                                                                                              |
|---------------|-----------------------------------|----------------------------------------------------------------------------------------------|
| pMA16_2       | gaggtggagGATGAGGACGCGAATCTTGG     | Construction of pMA16 (Amplification from genomic DNA DK1622) cloned HindIII-XbaI in pBJ114  |
| pMA16_3       | gtcctcatcCTCCACCTCAAGCCCGCGGC     | Construction of pMA16 (Amplification from genomic DNA DK1622) cloned HindIII-XbaI in pBJ114  |
| pMA16_4       | tagcctctacaTTCTTCGGCGCGGGCGAAATCC | Construction of pMA16 (Amplification from genomic DNA DK1622) cloned HindIII-XbaI in pBJ114  |
| <b>pMA25</b>  |                                   |                                                                                              |
| pMA25_1       | atcggaagcttCGGCATGACGCGCAGCTTCTTC | Construction of pMA25 (Amplification from genomic DNA SA2800) cloned HindIII-EcoRI in pBJ114 |
| pMA25_2       | cgggatccCTCCAGCGTGGCCTCGCAC       | Construction of pMA25 (Amplification from genomic DNA SA2800) cloned HindIII-EcoRI in pBJ114 |
| pMA25_3       | cgggatccCTGTGCTTCCCCGCCTGG        | Construction of pMA25 (Amplification from genomic DNA SA2800) cloned HindIII-EcoRI in pBJ114 |
| pMA25_4       | tagccgaattcGCGACGCGCTCGCCGTCCGG   | Construction of pMA25 (Amplification from genomic DNA SA2800) cloned HindIII-EcoRI in pBJ114 |
| <b>pMA29</b>  |                                   |                                                                                              |
| pMA29_1       | atcggaagcttCTTGAGGTGGAGCGCTTCCAG  | Construction of pMA29 (Amplification from genomic DNA DK1622) cloned HindIII-XbaI in pBJ114  |
| pMA29_2       | caactggcaGGCCACCCGGATGCGTTC       | Construction of pMA29 (Amplification from genomic DNA DK1622) cloned HindIII-XbaI in pBJ114  |
| pMA29_3       | cgggtggccTGCCAGTTGGGTGTGCAG       | Construction of pMA29 (Amplification from genomic DNA DK1622) cloned HindIII-XbaI in pBJ114  |
| pMA29_4       | tagcctctagaCCCTGGCCGCGCGGCGA      | Construction of pMA29 (Amplification from genomic DNA DK1622) cloned HindIII-XbaI in pBJ114  |
| <b>pSW33</b>  |                                   |                                                                                              |
| pSW01_1       | atcggaagcttGTGGTGCTCACCGCAAGACG   | Construction of pMA33 (Amplification from genomic DNA DK1622) cloned HindIII-XbaI in pBJ114  |
| pSW33_1       | GTCCTCATCaACGTGAAGTTC             | Construction of pMA33 (Amplification from genomic DNA DK1622) cloned HindIII-XbaI in pBJ114  |
| pSW33_2       | GAAGTTCACGTtGATGAGGAC             | Construction of pMA33 (Amplification from genomic DNA DK1622) cloned HindIII-XbaI in pBJ114  |
| pSW01_4       | tagcctctagaGCCGCTGCCGTTGCCAGGC    | Construction of pMA33 (Amplification from genomic DNA DK1622) cloned HindIII-XbaI in pBJ114  |
| <b>pMA134</b> |                                   |                                                                                              |
| pMA134_1      | atcggggatccGGCAGCACGGTGTCTGGTG    | Construction of pMA134 (Amplification from pAAR327) cloned BamHI-EcoRI in pGEX-2T            |
| pMA134_2      | tagccgaattcCACCACCTCCACCAGGCG     | Construction of pMA134 (Amplification from pAAR327) cloned BamHI-EcoRI in pGEX-2T            |
| <b>pMA234</b> |                                   |                                                                                              |
| pMA134_1      | atcggggatccGGCAGCACGGTGTCTGGTG    | Construction of pMA234 (Amplification from pAAR353) cloned BamHI-EcoRI in pGEX-2T            |
| pMA134_2      | tagccgaattcCACCACCTCCACCAGGCG     | Construction of pMA234 (Amplification from pAAR353) cloned BamHI-EcoRI in pGEX-2T            |
| <b>pMA156</b> |                                   |                                                                                              |
| pMA156_1      | atcggggatccGTGGGTGAGGTGTCTGGTG    | Construction of pMA156 (Amplification from pAAR327) cloned BamHI-EcoRI in pGEX-2T            |
| pMA156_2      | tagccgaattcGATGACGTCCTCCAGCGC     | Construction of pMA156 (Amplification from pAAR327) cloned BamHI-EcoRI in pGEX-2T            |
| <b>pMA256</b> |                                   |                                                                                              |
| pMA156_1      | atcggggatccGTGGGTGAGGTGTCTGGTG    | Construction of pMA256 (Amplification from pAAR353) cloned BamHI-EcoRI in pGEX-2T            |
| pMA156_2      | tagccgaattcGATGACGTCCTCCAGCGC     | Construction of pMA256 (Amplification from pAAR353) cloned BamHI-EcoRI in pGEX-2T            |

|               |                                                                                      |                                                                                             |
|---------------|--------------------------------------------------------------------------------------|---------------------------------------------------------------------------------------------|
| <b>pMA178</b> |                                                                                      |                                                                                             |
| pMA178_1      | atc <b>gggatcc</b> AAGCTGGCCCGCATCCTC                                                | Construction of pMA178 (Amplification from pAAR327) cloned BamHI-EcoRI in pGEX-2T           |
| pMA178_2      | tagcc <b>gaattc</b> AATCATCTCGAGCAACTG                                               | Construction of pMA178 (Amplification from pAAR327) cloned BamHI-EcoRI in pGEX-2T           |
| <b>pMA278</b> |                                                                                      |                                                                                             |
| pMA178_1      | atc <b>gggatcc</b> AAGCTGGCCCGCATCCTC                                                | Construction of pMA278 (Amplification from pAAR353) cloned BamHI-EcoRI in pGEX-2T           |
| pMA178_2      | tagcc <b>gaattc</b> AATCATCTCGAGCAACTG                                               | Construction of pMA278 (Amplification from pAAR353) cloned BamHI-EcoRI in pGEX-2T           |
| <b>pMA10</b>  |                                                                                      |                                                                                             |
| pMA10_1       | atc <b>gggatcc</b> TCTGAAGAAAAAGCGCGC                                                | Construction of pMA10 (Amplification from genomic DNA DK1622) cloned BamHI-EcoRI in pGEX-2T |
| pMA10_2       | tagcc <b>gaattc</b> TCACTGGTGGGAGCGGG                                                | Construction of pMA10 (Amplification from genomic DNA DK1622) cloned BamHI-EcoRI in pGEX-2T |
| <b>pMA13</b>  |                                                                                      |                                                                                             |
| pMA10_1       | atc <b>gggatcc</b> TCTGAAGAAAAAGCGCGC                                                | Construction of pMA13 (Amplification from pSW33) cloned BamHI-EcoRI in pGEX-2T              |
| pMA10_2       | tagcc <b>gaattc</b> TCACTGGTGGGAGCGGG                                                | Construction of pMA13 (Amplification from pSW33) cloned BamHI-EcoRI in pGEX-2T              |
| <b>pMA112</b> |                                                                                      |                                                                                             |
| pMA112_1      | atc <b>ggaattc</b> cattaaagaggagaaattaactatgcatcaccat<br>caccatcacGAGCTGGCGGTGGCCAAG | Construction of pMA13 (Amplification from pSW33) cloned BamHI-EcoRI in pGEX-2T              |
| pMA112_2      | tagcc <b>aagctt</b> catcaggccatggtgccacgtg                                           | Construction of pMA13 (Amplification from pSW33) cloned BamHI-EcoRI in pGEX-2T              |
| <b>pMA1-4</b> |                                                                                      |                                                                                             |
|               | No primer used                                                                       | Construction by digest of pAAR327 with SmaI and HindIII, 2133bp fragment cloned into pMA112 |

\*Sequences in bold indicate restriction sites used for cloning.

Sequences in uppercase indicate sequences in the respective gene.

Sequences in lower case indicate additional sequences needed for cloning.

Table S2: Similarity and identity of proteins encoded by ORFs in *rodK* loci in *M. xanthus* and *S. aurantiaca*

| <b>MXAN#</b> | <b>Annotation of MXAN protein</b>                     | <b>STIAU#</b> | <b>Identity %</b> | <b>Similarity %</b> |
|--------------|-------------------------------------------------------|---------------|-------------------|---------------------|
| 0717         | hypothetical protein                                  | 5689          | 66                | 75                  |
| 0718         | hypothetical protein                                  | 5688          | 67                | 78                  |
| 0719         | hypothetical protein                                  |               |                   |                     |
| 0720         | sensor histidine kinase                               | 5687          | 40                | 55                  |
| 0721         | heme ABC transporter, ATP-binding protein             |               |                   |                     |
| 0722         | putative membrane protein                             |               |                   |                     |
| 0723         | putative lipoprotein                                  |               |                   |                     |
| 0724         | putative serine/threonine protein kinase              | 5685          | 54                | 66                  |
| 0725         | ABC1 domain protein                                   | 5684          | 70                | 82                  |
| RokB         | response regulator                                    | 5683          | 80                | 90                  |
| RokC         | response regulator                                    | 5679          | 57                | 70                  |
| 0729         | conserved hypothetical protein                        |               |                   |                     |
| 0730         | O-methyltransferase family protein                    | 5677          | 72                | 83                  |
| 0731         | tryptophan2,3dioxygenase                              | 5675          | 68                | 81                  |
| RokA         | response regulator                                    | 5674          | 74                | 84                  |
| RodK         | hybrid sensor histidine kinase                        | 5673          | 69                | 82                  |
| 0734         | conserved hypothetical protein                        | 5672          | 79                | 89                  |
| 0735         | hypothetical protein                                  | 5670          | 59                | 70                  |
| 0736         | sensor histidine kinase                               | 5669          | 51                | 64                  |
| 0737         | putative RNA polymerase-associated protein RapA       | 5668          | 83                | 91                  |
| 0738         | conserved hypothetical protein                        |               |                   |                     |
| 0739         | hypothetical protein                                  |               |                   |                     |
| 0740         | hypothetical protein                                  |               |                   |                     |
| 0741         | hypothetical protein                                  |               |                   |                     |
| 0742         | hypothetical protein                                  | 5656          | 82                | 91                  |
| 0743         | hypothetical protein                                  | 5655          | 71                | 76                  |
| 0744         | hypothetical protein                                  |               |                   |                     |
| 0745         | hypothetical protein                                  | 5654          | 52                | 66                  |
| 0746         | hypothetical protein                                  | 5653          | 37                | 51                  |
| 0747         | putative lipoprotein                                  |               |                   |                     |
| 0748         | ABC transporter, ATP-binding protein/permease protein | 5650          | 80                | 88                  |
